# Supplementary material for: Laboratory performance of stone matrix asphalt mixtures with two aggregate gradations
Source: Springer Nature journal article supplement (doi:10.1007/s40534-015-0071-5), 2015-04-07
Supplement: MOESM2 [file 10911528]

## Sheet: Fig. 4
		Number of Passes	Deformation (mm)
			SMA 1	SMA 2
		0	0	0
		1000	1.2	1.6
		2000	1.9	2.4
		3000	2.3	2.8
		4000	2.6	3.1
		5000	2.9	3.4
		6000	3.2	3.8
		7000	3.4	4.2
		8000	3.7	4.5
		9000	3.9	4.7
		10000	4.1	4.8

## Sheet: Fig. 7
	Mix	ITS Load	Average Load Applied (kg)	% of ITS Load	Fatigue Life	Initial tensile stress, σi
	SMA 1	1173	176.45	15.0426	7562.06	0.167326
			386.81	32.9761	2993.49	0.364038
			579.65	49.416	1269.05	0.557311
	SMA 2	916	137.13	14.9705	7256	0.128668
			306.78	33.4913	2645	0.291805
			459.36	50.1485	1093	0.429076
